# Supplementary material for: miR2118-dependent U-rich phasiRNA production in rice anther wall development
Source: PubMed Central journal article supplement (PMC7305157; doi:10.1038/s41467-020-16637-3), 2020-06-19
Supplement: 41467_2020_16637_MOESM1_ESM.pdf [file 41467_2020_16637_MOESM1_ESM.pdf]

## **Supplementary Information**

**miR2118-dependent U-rich phasiRNA production in rice anther wall development**

***Komiya et al.***

Supplementary Figures 1 to 11  
Supplementary Tables 1 to 4

# Supplementary Figure 1

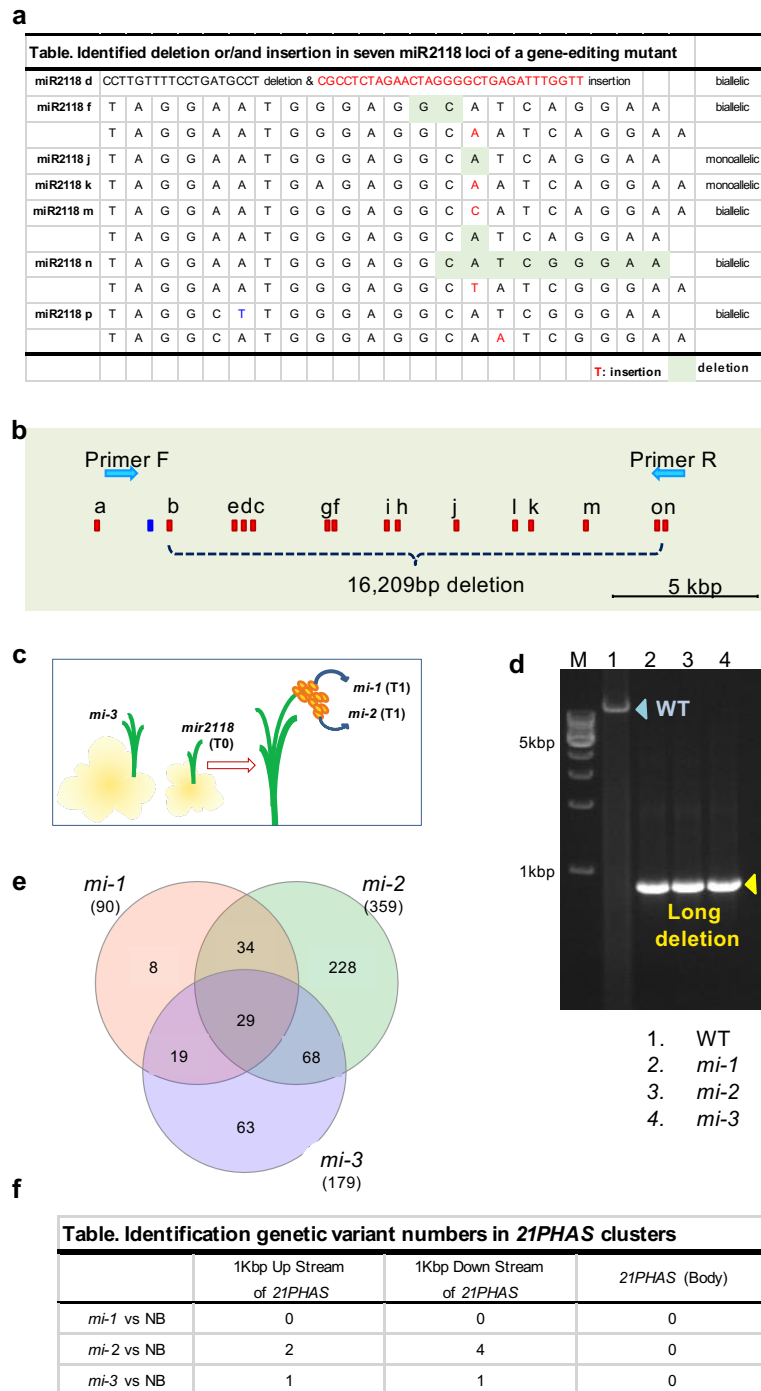

## Supplementary Figure 1. Variation of the *mir2118* mutant lines.

**a.** Table of identified deletion and/or insertion mutations at seven miR2118 family loci of a gene editing mutant. This mutant (T0) demonstrated complete sterility, and therefore this line was not used for further experiments. **b.** Schematic structure of miR2118 gene clusters (a-n) at chromosome 4. Light blue arrows represent the forward and reverse primers to detect deletions of the miR2118 loci. **c.** Origins of three *mir2118*-deleted lines, *mi-1*, *mi-2*, and *mi-3*. **d.** PCR analysis detects long deletion in the *mir2118* mutants using the primers shown in (b). **e.** A Venn-diagram for genetic variations identified among *mi-1*, *mi-2*, and *mi-3*. **f.** Table for identified genetic variations in the 21PHAS body at 1kb upstream and downstream in the clusters of three *mir2118* lines. NB means “Nipponbare” genome used as control.

## Supplementary Figure 2

**a**

| Table. Segregation rate of <i>mir2118</i> in BCF2 population |                 |                  |           |         |
|--------------------------------------------------------------|-----------------|------------------|-----------|---------|
|                                                              | WT/H (+/+; +/-) | homozygous (-/-) | X-squared | p-value |
| <i>mi-1</i>                                                  | 48              | 20               | 0.70588   | 0.4008  |
| <i>mi-2</i>                                                  | 41              | 9                | 1.3067    | 0.253   |
| <i>mi-3</i>                                                  | 35              | 8                | 0.93798   | 0.3328  |

**b**

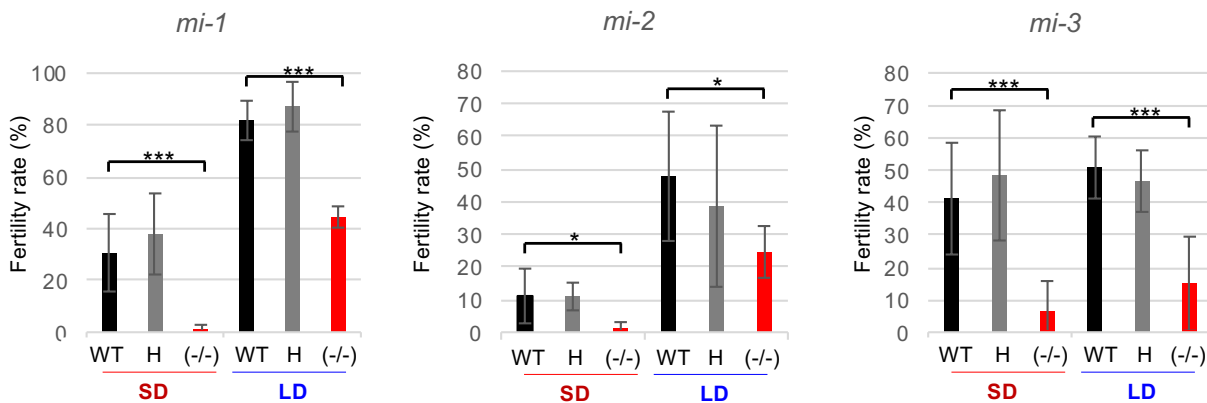

*t*-test, \* *p*-value < 0.05, \*\*\* *p*-value < 0.001

### Supplementary Figure 2. Segregation and fertility of *mir2118*.

**a.** Table showing the segregation rate of offspring from heterozygous *mi-1*, *mi-2*, and *mi-3*. The mutants were backcrossed once to Nipponbare, and the F<sub>2</sub> populations were analyzed (BCF<sub>2</sub>). The deletion showed Mendelian inheritance in three *mir2118* lines using chi-square test. (WT: wild type from siblings, H: heterozygous, and -/-: homozygous). **b.** Fertility of *mir2118* under long day (LD) and short day (SD) conditions. Homozygous mutants (-/-) demonstrated sterility in *mi-1*, *mi-2*, and *mi-3*; wild-type (siblings) and heterozygotes of *mi-1*, *mi-2*, and *mi-3* set seeds under SD and LD conditions. Bar represents mean ± S.D. (N=3 or 4). \* *p*<0.05, \*\*\* *p*<0.001, Student's *t*-test.

## Supplementary Figure 3

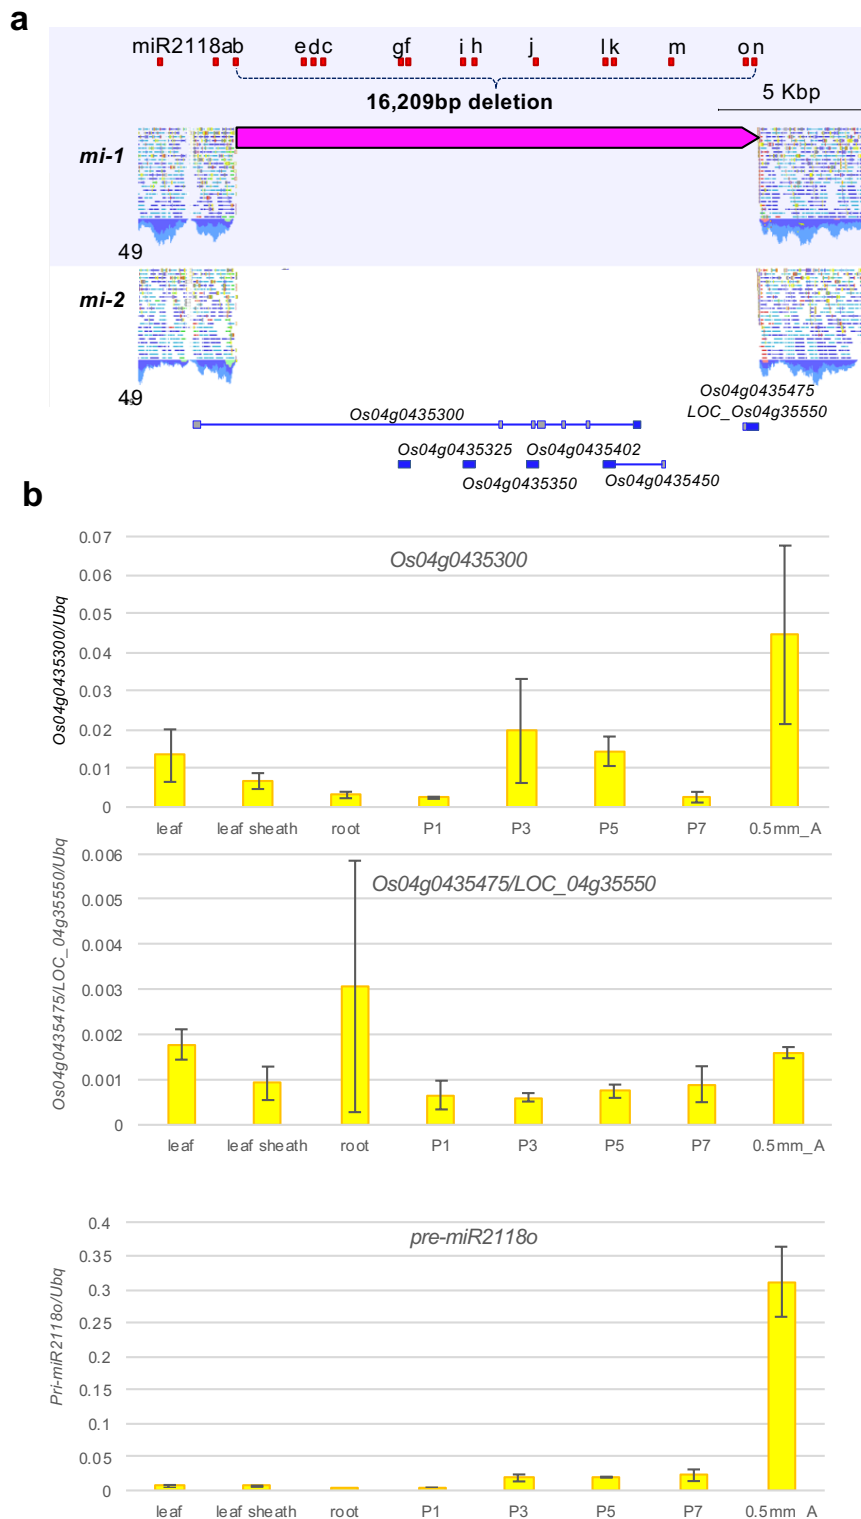

### Supplementary Figure 3. Developmental expression of genes at miR2118-deleted regions.

**a.** Schematic structure of miR2118 loci and genes predicted at the cluster in chromosome 4. **b.** qPCR analysis of two genes that were identified in RAP-DB and/or MSU, and *pre-miR2118o* at different developmental stages in wild-type. P1, P3, P5, and P7: 1cm, 3cm, 5cm and 7cm panicles, A: 0.5 mm anthers (Stage 2). Bar represents mean  $\pm$  S.D. (N=3).

## Supplementary Figure 4

**a**

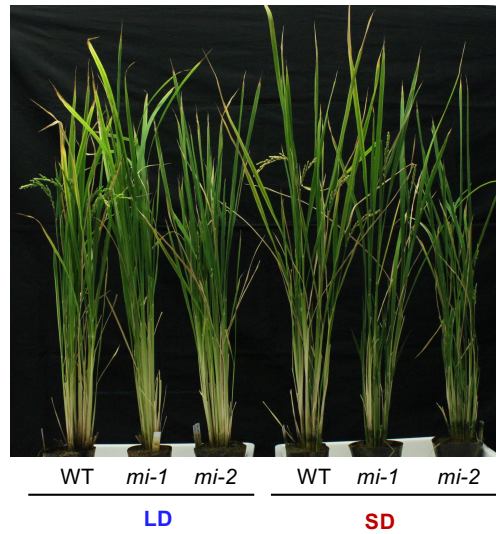

**b**

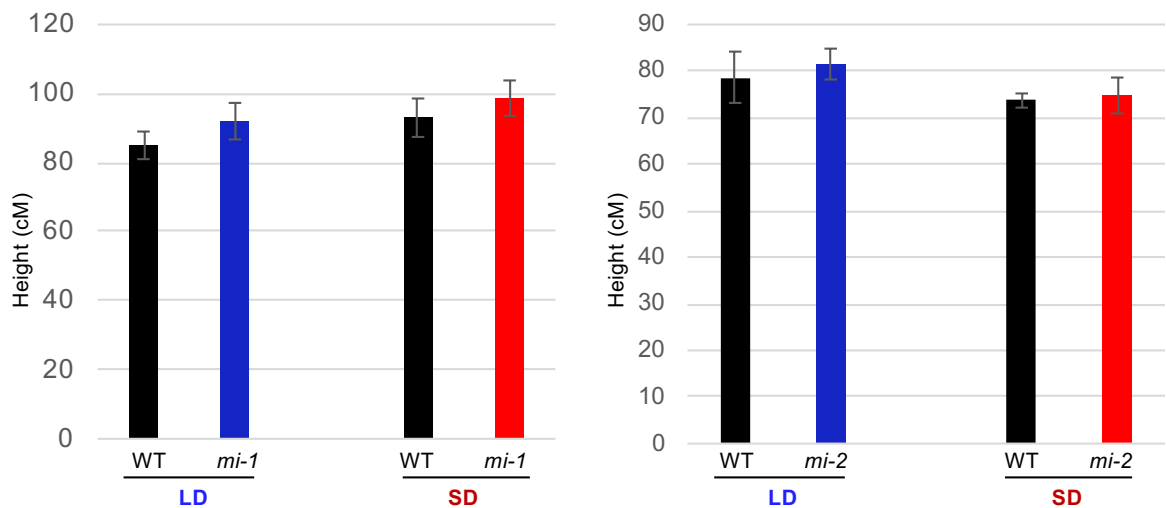

*t*-test, LD: *p*-value= 0.1416, SD: *p*-value= 0.2646

*t*-test, LD: *p*-value= 0.4305, SD: *p*-value= 0.6708

### Supplementary Figure 4. Growth of *mir2118* under SD and LD conditions.

**a.** *mir2118* mutants grown under SD and LD conditions. **b.** Plant height of *mi-1* and *mi-2* in SD and LD (86 days). Each bar represents mean  $\pm$  S.D. (N=3). No statistically significant differences were found between WT and *mi-1* or *mi-2* using Student's *t*-tests.

## Supplementary Figure 5

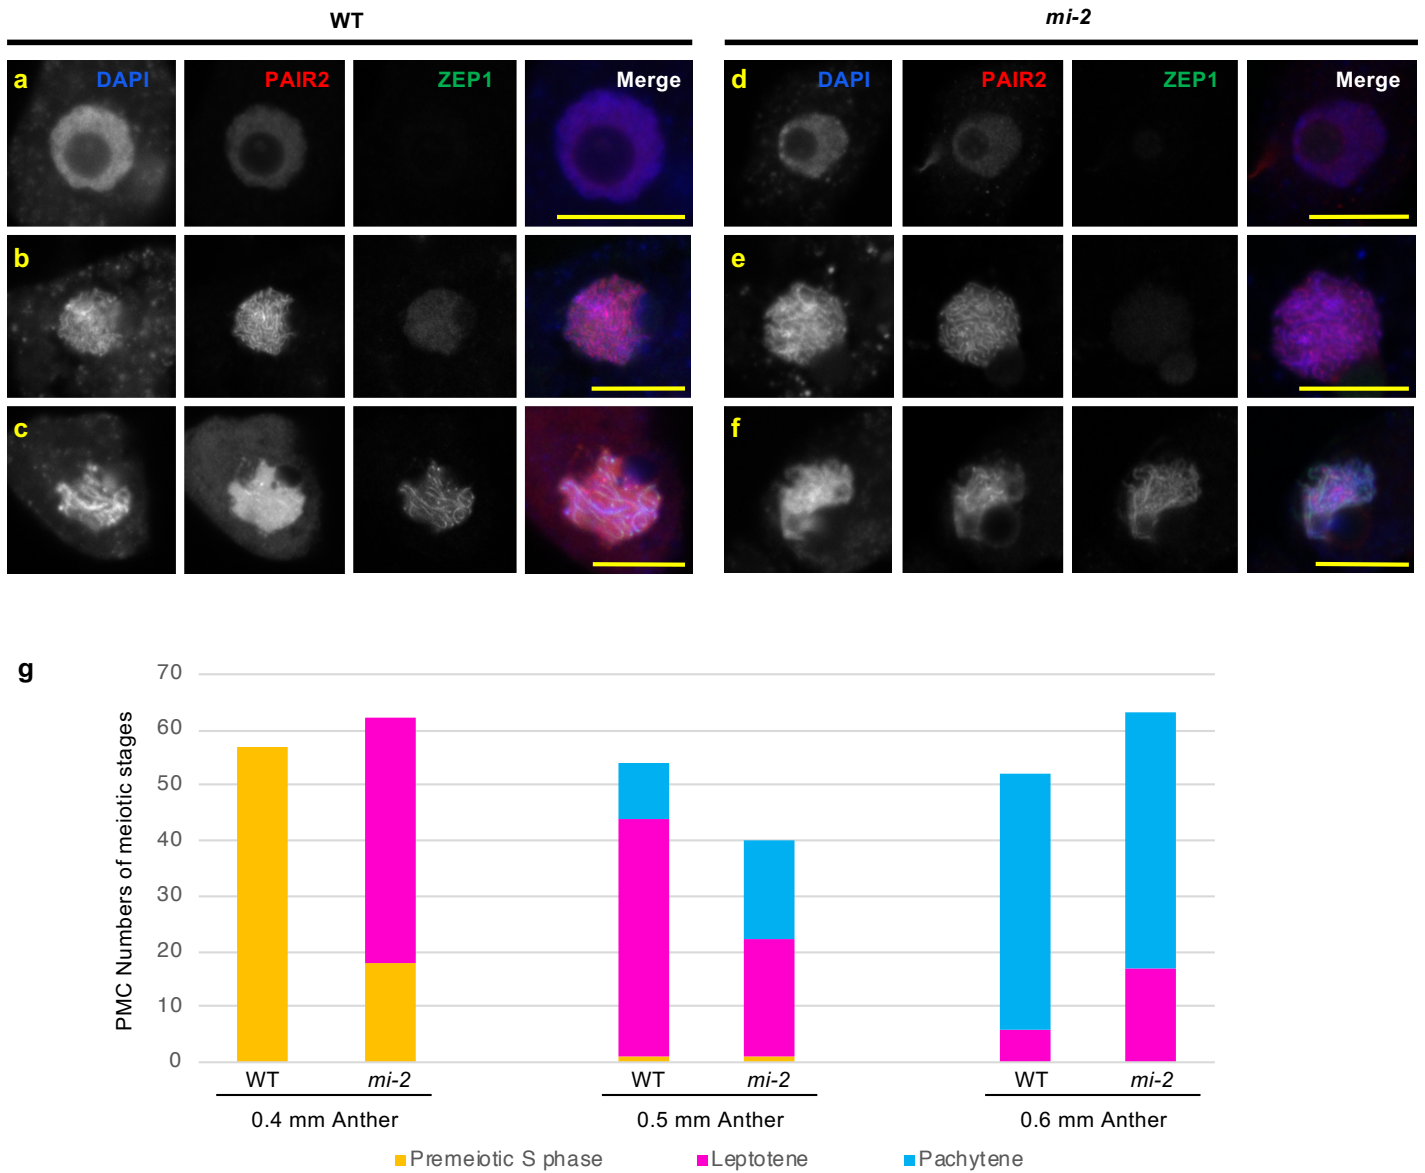

### Supplementary Figure 5. Completion of homologous chromosome synapsis in PMC of *mir2118*.

**a-f.** Immuno-staining of pollen mother cells (PMC) at Stages 1 (**a, d**), Stage 2 (**b, e**), and Stage 3 (**c, f**) of WT (**a-c**) and *mi-2* (**d-f**) stained with PAIR2 (red) and ZEP1 (green) antibodies. DAPI staining is shown in blue. ZEP1 elongates along with homologous chromosome pairs. Yellow bars show 10 $\mu$ m.

**g.** Frequency of PMCs in the 0.4 mm to 0.6 mm anther at Stages 1 to 3.

## Supplementary Figure 6

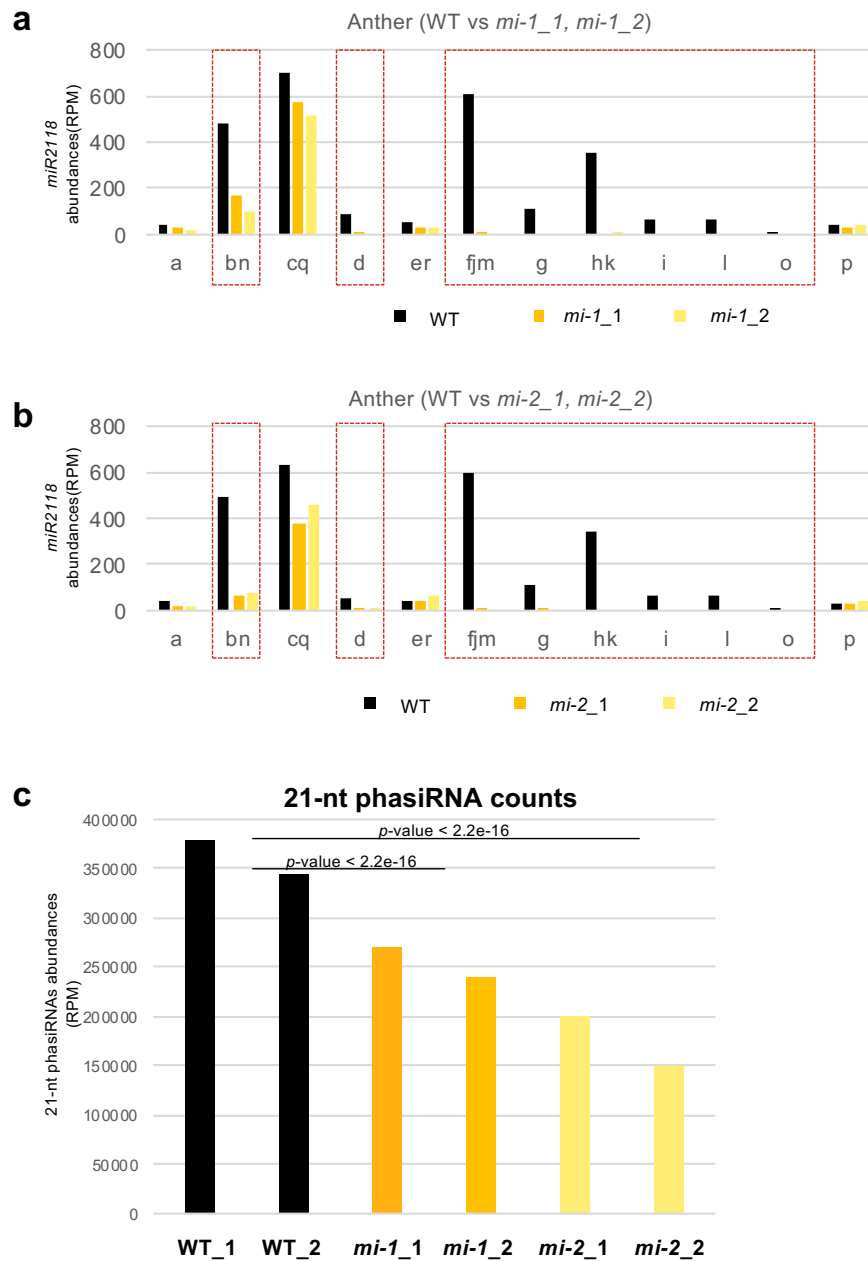

### Supplementary Figure 6. Reduction of miR2118 expression in *mir2118*.

**a** and **b**. The expression levels of twelve mature miR2118s in WT, *mi-1*, and *mi-2*, as detected in small RNA-sequences. Expressions of eight miR2118bn, d, fjm, g, hk, i, l, and o were reduced in the 0.5 mm anthers of *mi-1* and *mi-2*. Small RNA-sequence was performed with two replicates for each sample. RPM; Reads per million. **c**. Read counts of 21-nt phasiRNA expressed in the anthers of the WT and *mir2118* mutants. The read counts demonstrated the two replicates of each sample. Statistically significant differences were found in anthers (Stage 2) between WT and *mi-1* or *mi-2* using chi-square test.

## Supplementary Figure 7

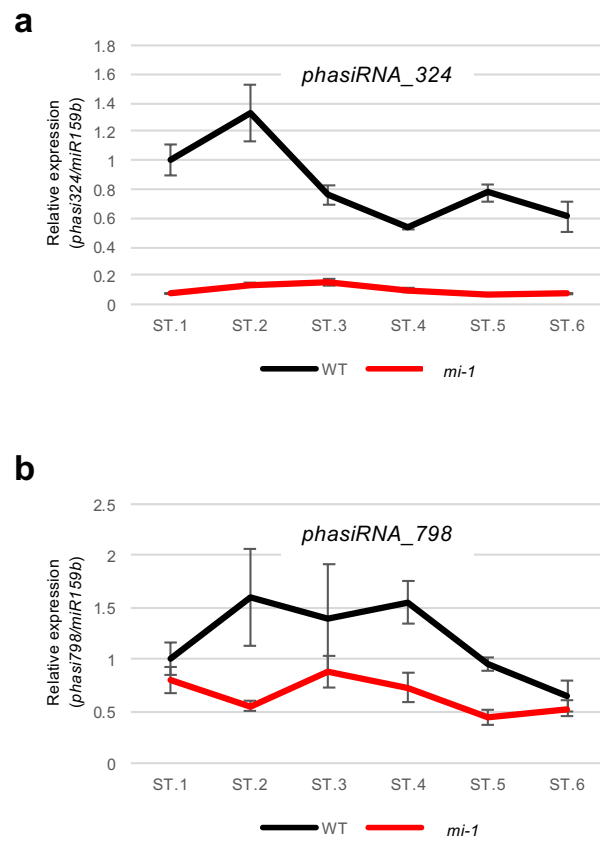

### Supplementary Figure 7. qPCR analysis of two phasiRNAs at different anther developmental stages in WT and *mi-1*.

PhasiRNAs at *PHAS324* (a) and *PHAS798* (b) were decreased in *mi-1* during the anther development from Stage 1 to Stage 6. Data are mean  $\pm$  S.D. of three technical replicates.



## Supplemental Figure 8

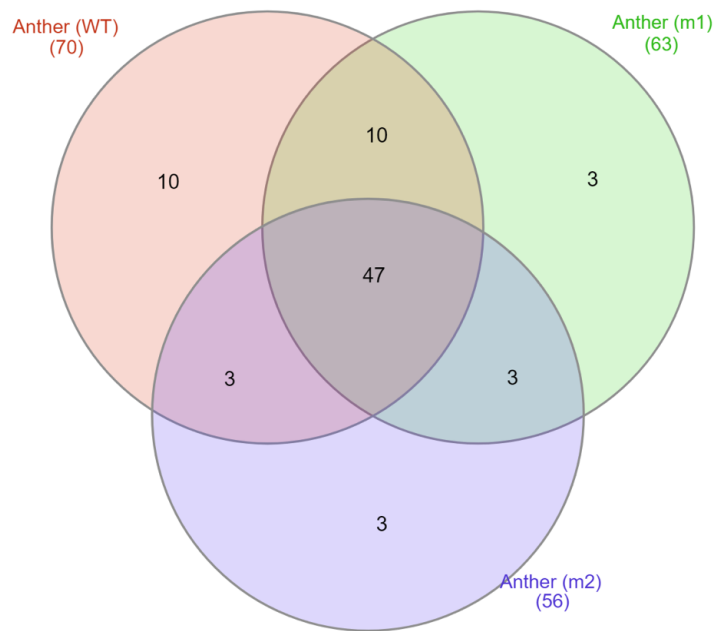

### **Supplementary Figure 8. 24-nt phasiRNA clusters in anther.**

Venn-diagram showing overlapping 24-nt phasiRNA clusters in WT, *mi-1*, and *mi-2* in anther. Loss of miR2118 did not strongly affect the production of 24-nt phasiRNAs.

Supplementary Figure 9

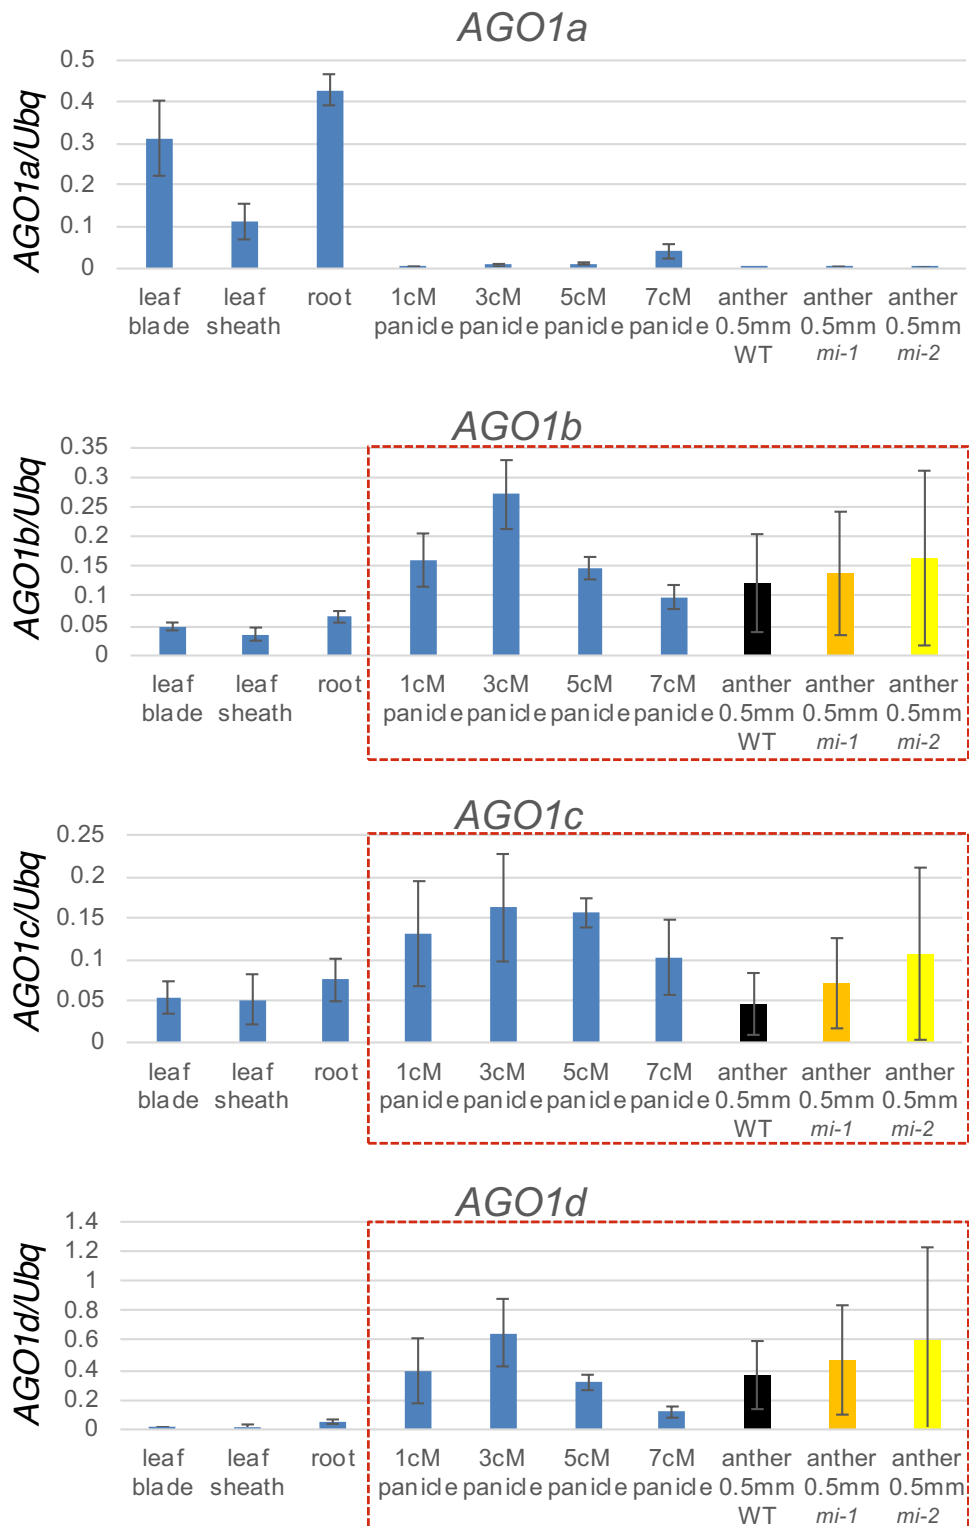

**Supplementary Figure 9. Expression of *OsAGO1* subfamilies during vegetative and reproductive development.**

qPCR analysis of *AGO1* genes in different rice tissues. No statistically significant differences were found in anthers (Stage 2) between WT and *mi-1* or *mi-2* using Student's *t*-tests. Data are mean  $\pm$  S.D. of three biological replicates.

Supplementary Figure 10

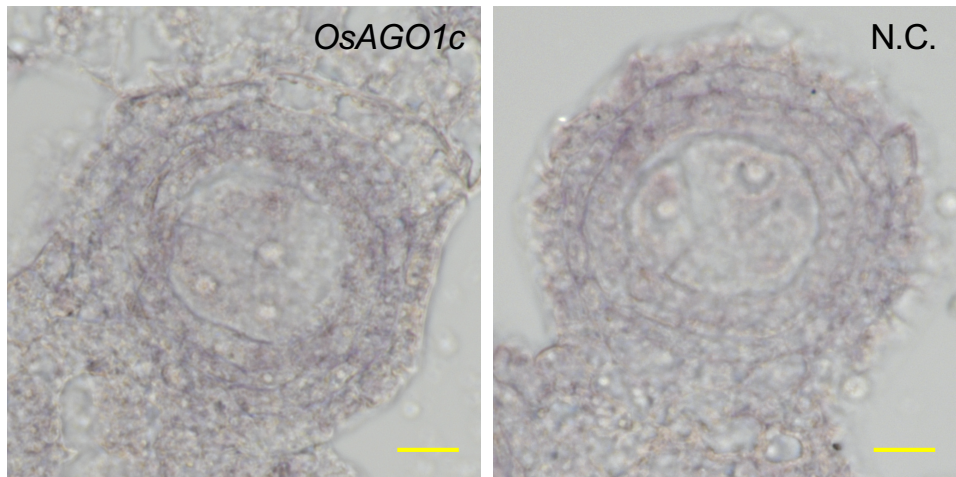

**Supplementary Figure 10.** *In situ* hybridization of *OsAGO1c* in the anther. *AGO1c* expression was not detected at Stage 1. Negative control (N.C.). Bars show 10 $\mu$ m.

## Supplementary Figure 11

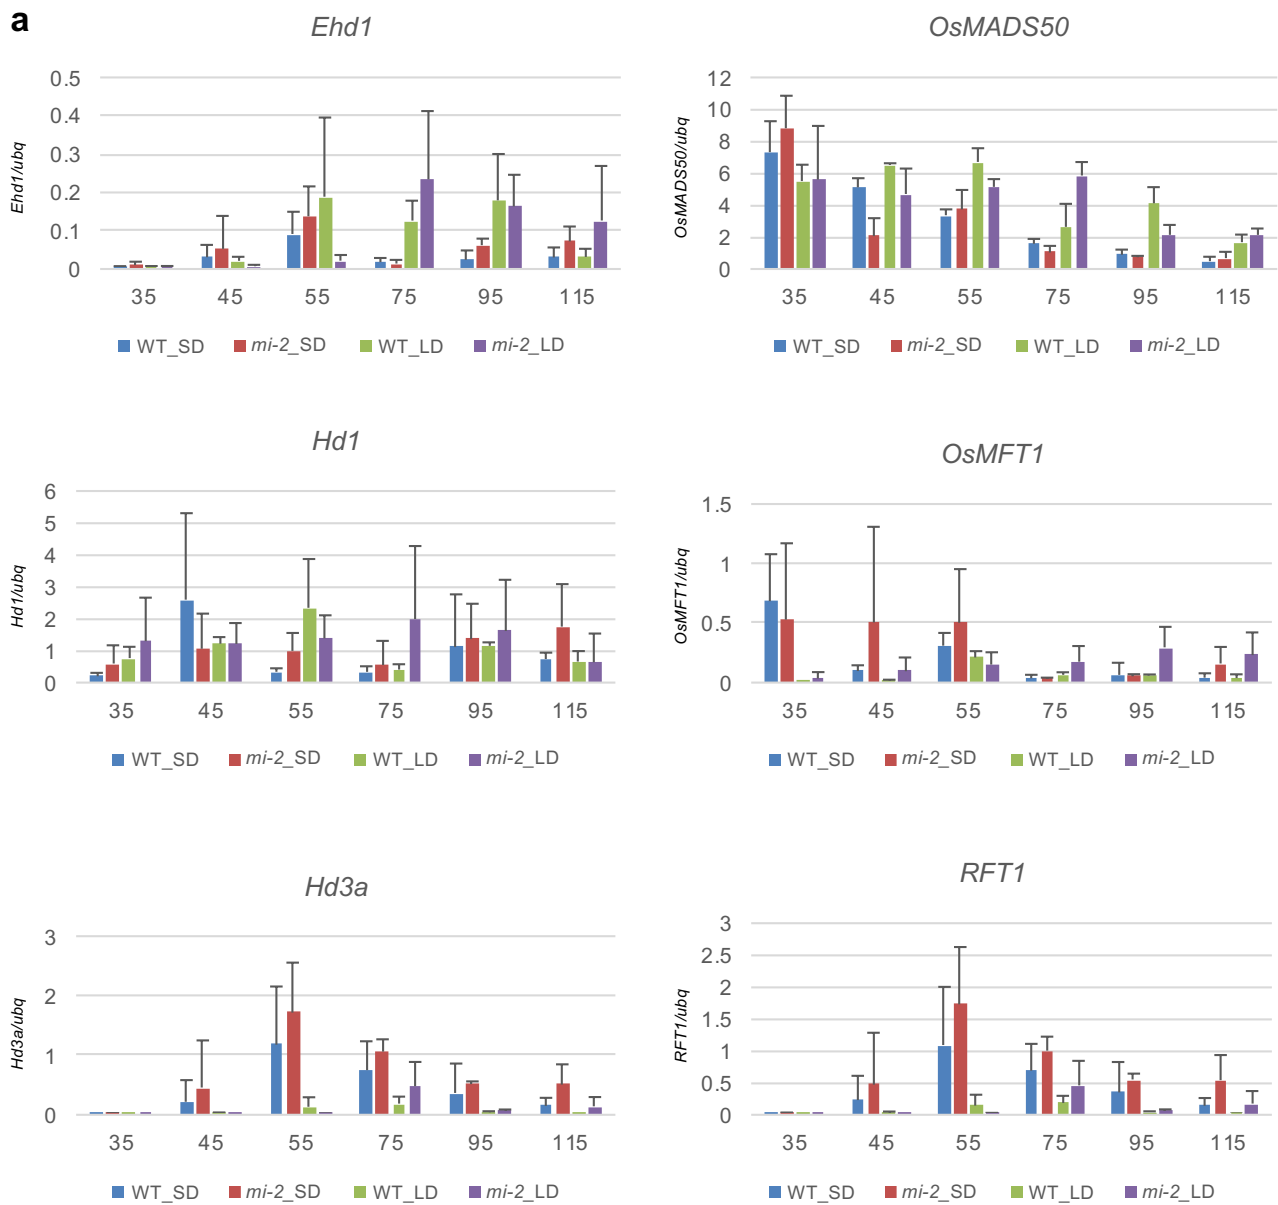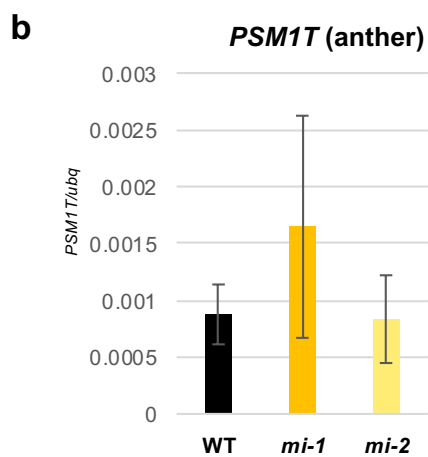

### Supplementary Figure 11. Expression of photoperiodic genes in *mir2118* mutant.

**a.** Expression of *Ehd1*, *Hd1*, *Hd3a*, *OsMFT1*, *RFT1*, and *OsMADS50* in *mi-2* and WT under SD and LD conditions. Expression levels of the flowering genes were not affected in *mi-2*. Leaves were collected from *mi-2* and WT plants at 35, 45, 55, 75, 95, and 115 days (ZT0) under short-day (SD) and long-day (LD) conditions. Data are mean  $\pm$  S.D. of three biological replicates. **b.** Expression of *PSM1T* in 0.5mm anthers (at Stage 2) in WT, and *mir2118* plants under SD conditions.

**Supplementary Table 1. Stigma numbers of WT, *mi-1* and *mi-2***

|             | Stigma numbers |    |   |
|-------------|----------------|----|---|
|             | 2              | 3  | 4 |
| WT          | 158            | 4  | 0 |
| <i>mi-1</i> | 115            | 16 | 5 |
| <i>mi-2</i> | 108            | 26 | 2 |

Fisher's Exact Test for Count Data

*mi-1*,  $p$ -value = 9.182e-05

*mi-2*,  $p$ -value = 4.066e-07

*mir2118* mutants are written in *italic*

**Supplementary Table 2. Pollination of WT pollen to *mir2118* flowers or *mir2118* pollen to WT flowers**

| P (♀)       | × | P (♂)       | flower numbers | fertile seeds | %      |
|-------------|---|-------------|----------------|---------------|--------|
| WT          | × | WT          | 48             | 24            | 50     |
| WT          | × | WT          | 38             | 21            | 55     |
| <i>mi-3</i> | × | WT          | 31             | 1             | 3 ***  |
| <i>mi-1</i> | × | WT          | 48             | 4             | 8 ***  |
| WT          | × | <i>mi-3</i> | 43             | 6             | 14 *** |
| WT          | × | <i>mi-1</i> | 34             | 2             | 6 ***  |

Binom test, \*\*\**p*-value < 0.01

*mir2118* mutants are written in italic

**Supplementary Table 3. Summary of small RNAs reads mapped on the rice genome**

|        | 0.5mm anthers |          |                |                |                |                |
|--------|---------------|----------|----------------|----------------|----------------|----------------|
|        | WT_A1         | WT_A2    | <i>mi-1_A1</i> | <i>mi-1_A2</i> | <i>mi-2_A1</i> | <i>mi-2_A2</i> |
| Input  | 9063663       | 14910428 | 5728785        | 6975046        | 8353559        | 4283352        |
| mapped | 5740964       | 9625588  | 3781495        | 4392294        | 4675912        | 2662278        |

*mir2118* mutants are written in italic

**Supplementary Table 4. Primer sequences used in this study**

| <b>Primer</b>                              | <b>Sequences</b>                   |
|--------------------------------------------|------------------------------------|
| <b><u>miR2118 gene targetting (GT)</u></b> |                                    |
| miR2118 gRNA                               | CAATAGGAATGGGAGGCATC               |
| <b><u>qPCR</u></b>                         |                                    |
| <i>Ubq</i> -F                              | ATCAAGAACTAGAGCGTCACTC             |
| <i>Ubq</i> -R                              | GCTGAAGCATCCAGCACAGTA              |
| <i>Os04g0435300</i> F                      | TATAGTTTCTCTTCAGCCATGCGC           |
| <i>Os04g0435300</i> R                      | AGTACCTATATATACGCCTCTCACC          |
| <i>Os04g0435475</i> F                      | GCCATTGTTTGCACTTTTGCACTAC          |
| <i>Os04g0435475</i> R                      | TCTTGTCTGAAACTCTGAAACCAG           |
| <i>WT_An_PHAS_324</i> qPCR F               | tctagggttagcaacagcacagt            |
| <i>WT_An_PHAS_324</i> qPCR R               | ggcaaaagctagggactggttg             |
| <i>WT_An_PHAS_1586</i> qPCR F              | gccattgccatgttggactttg             |
| <i>WT_An_PHAS_1586</i> qPCR R              | ctgcaatgtgacatggaggatgaac          |
| <i>AGO1a</i> qPCR F                        | GAAAGTTTCCACTCTGTCTGCGGG           |
| <i>AGO1a</i> qPCR R                        | AGTAGTACCCGTTGTCCAAGTGG            |
| <i>AGO1b</i> qPCR F                        | AGCACCGGTGAGAGTTCTGGAG             |
| <i>AGO1b</i> qPCR R                        | CACCTGGATGGTGTGAACCTTG             |
| <i>AGO1c</i> qPCR F                        | AGCTGCAGCTGCAACTCTCCATC            |
| <i>AGO1c</i> qPCR R                        | TTCCACCAGGATCTGGAGCCT              |
| <i>AGO1d</i> qPCR F                        | AGGAGCACTGCATTACTGGTAGTG           |
| <i>AGO1d</i> qPCR R                        | GATTCAGCTCACATCCAGACGAAC           |
| <i>OsMFT1</i> qPCR F                       | GACCTAGCTAGCTAATAAGCCATC           |
| <i>OsMFT1</i> qPCR R                       | CCACATAAACGACGACATGATATGG          |
| <i>OsMADS50</i> -F                         | CAGGCCAGGAATAAGCTGGAT              |
| <i>OsMADS50</i> -R                         | TTAGGATGGTTTGGTGTGATTGC            |
| <i>Ehd1</i> -F                             | TGCAAATGGCGCTTTTGTAT               |
| <i>Ehd1</i> -R                             | ATATGTGCTGCCAAATGTTGCT             |
| <i>RFT1</i> -F                             | TGACCTAGATTCAAAGTCTAATCCTT         |
| <i>RFT1</i> -R                             | TGCCGGCCATGTCAAATTAATAAC           |
| <i>Hd3a</i> -F                             | GCTCACTATCATCATCCAGCATG            |
| <i>Hd3a</i> -R                             | CCTTGCTCAGCTATTTAATTGCATAA         |
| <i>Hd1</i> -F                              | TCAGCAACAGCATATCTTTCTCATCA         |
| <i>Hd1</i> -R                              | TCTGGAATTTGGCATATCTATCACC          |
| <i>PSM1T</i> qPCR F                        | caaatactggaacacagtcacag            |
| <i>PSM1T</i> qPCR R                        | catggacaattggtgataccaggc           |
| <b><u>small RNA qPCR</u></b>               |                                    |
| <i>miR159b</i> F qPCR                      | tttgattgaaggagactctg               |
| <i>phasi324</i> F qPCR                     | CTGTGCTGTTGCTAACCCCTAG             |
| <i>phasi798</i> F qPCR                     | TCATAGACTGTGTAAGCTGCT              |
| <b><u>ISH probe</u></b>                    |                                    |
| <i>AGO1b</i> ISH F                         | AGCACCGGTGAGAGTTCTGGAG             |
| <i>AGO1b</i> ISH R                         | GCTGAAACTGTTGTTGGACTTGTC           |
| <i>AGO1c</i> ISH F                         | AGCTGCAGCTGCAACTCTCCATC            |
| <i>AGO1c</i> ISH R                         | GGCATCCACAGGTTGTTCTGAG             |
| <i>AGO1d</i> ISH F                         | AGGAGCACTGCATTACTGGTAGTG           |
| <i>AGO1d</i> ISH R                         | GCTCATGTGGAGCATCCATTGCTTG          |
| <i>MEL1</i> ISH F                          | GCATTGTCTCAAGCAGAGTTAAGGC          |
| <i>MEL1</i> ISH R                          | CCTGAAATCACCAAATACCG               |
| osa-miR2118fjm                             | 5DiGN/TAGGAATGGGAGGCATCAGGAA/3DiGN |
| miRCURY LNA (negative control)             | 5DiGN/GTGTAAACAGTCTATACGCCCA/3DiGN |

Gene name and small RNAs are written in *italic*
